# Supplementary material for: Reconstruction of a Genome-Scale Metabolic Model of Streptomyces albus J1074: Improved Engineering Strategies in Natural Product Synthesis
Source: MDPI journal article supplement (doi:10.3390/metabo11050304), 2021-05-11
Supplement: s1 [file s1]

| Reaction ID                                                                                                                                             | Pathway                                                           | <i>Salb</i> -GEM genes                             | <i>Sco</i> -GEM genes |
|---------------------------------------------------------------------------------------------------------------------------------------------------------|-------------------------------------------------------------------|----------------------------------------------------|-----------------------|
| CPMPS                                                                                                                                                   | Porphyrin and chlorophyll metabolism                              | (XNR_0124 and XNR_2127) or (XNR_4999 and XNR_2127) | SCO1821 and SCO3180   |
| PC17M                                                                                                                                                   | Porphyrin and chlorophyll metabolism                              | XNR_4670 or XNR_4968                               | SCO1857               |
| REDS32                                                                                                                                                  | Undecylprodigiosin Biosynthesis                                   | (XNR_4512 and XNR_0019) or (XNR_4512 and XNR_5920) | SCO2387 and SCO5890   |
| MMSAD1, MMSAD2, MMSAD3, MMSAD5, MMTSAO                                                                                                                  | Valine, leucine and isoleucine degradation, propanoate metabolism | XNR_0154 or XNR_4241                               | SCO2726               |
| GCALDD                                                                                                                                                  | Glyoxylate and dicarboxylate metabolism                           | XNR_0363 or XNR_1178 or XNR_5220                   | SCO3486               |
| MTHFC, MTHFD                                                                                                                                            | Folate metabolism                                                 | XNR_3872 or XNR_5257                               | SCO4824               |
| MPTS                                                                                                                                                    | Folate biosynthesis                                               | XNR_0122 or XNR_1602                               | SCO5201               |
| MOADSUX                                                                                                                                                 | Metabolism of cofactors and vitamins                              | (XNR_1347 and XNR_0122) or (XNR_1347 and XNR_1602) | SCO5486 and SCO5201   |
| PSSA120, PSSA140, PSSA141, PSSA150, PSSA160, PSSA161, PSSA170, PSSA180, PSSA181, PSSAai150, PSSAai170, PSSAi140, PSSAi150, PSSAi160, PSSAi170, PSSAi180 | Glycerophospholipid metabolism                                    | XNR_0462 or XNR_3542                               | SCO6467               |

**Table S3.** Metabolic reactions in *Salb* -GEM and *Sco* -GEM associated with essential genes predicted in *Sco* -GEM with multiple paralogues in *Salb* -GEM. The table is organized by *S. coelicolor* genes in ascending order.
