# Supplementary material for: Reconstruction of a Genome-Scale Metabolic Model of Streptomyces albus J1074: Improved Engineering Strategies in Natural Product Synthesis
Source: MDPI journal article supplement (doi:10.3390/metabo11050304), 2021-05-11
Supplement: s1 [file s1]

| Reaction ID                                                                                                                                                                                                                                                                                                                                                                                  | Pathway                                                                        | <i>Salb</i> -GEM genes                                                    | <i>Sco</i> -GEM genes                                                              |
|----------------------------------------------------------------------------------------------------------------------------------------------------------------------------------------------------------------------------------------------------------------------------------------------------------------------------------------------------------------------------------------------|--------------------------------------------------------------------------------|---------------------------------------------------------------------------|------------------------------------------------------------------------------------|
|                                                                                                                                                                                                                                                                                                                                                                                              |                                                                                | XNR_0617 and XNR_4724 and XNR_4726 and XNR_4729 and XNR_4930 and XNR_4933 | (SCO1934 and SCO2156 and (SCO7234 or SCO2155) and SCO2151 and SCO1930 and SCO2154) |
| CYO2b                                                                                                                                                                                                                                                                                                                                                                                        | Oxidative phosphorylation                                                      |                                                                           |                                                                                    |
| DXPS                                                                                                                                                                                                                                                                                                                                                                                         | Metabolism of cofactors and vitamins                                           | XNR_0772                                                                  | SCO6013 or SCO6768                                                                 |
| DHDPS                                                                                                                                                                                                                                                                                                                                                                                        | Threonine and Lysine metabolism                                                | XNR_1123                                                                  | SCO1889 or SCO1912 or SCO5744 or SCO6292                                           |
| MECDPDH2, MECDPH5_2                                                                                                                                                                                                                                                                                                                                                                          | Terpenoid backbone biosynthesis                                                | XNR_1162                                                                  | SCO5696 or SCO6767                                                                 |
| NH4t                                                                                                                                                                                                                                                                                                                                                                                         | Ionorganic ion transport and metabolism                                        | XNR_1224                                                                  | SCO5583 or SCO3085                                                                 |
| KARA1, KARA1i, KARA2, KARI, KARI_23dhmb, KARI_23dhmp, KARI_3hmoa                                                                                                                                                                                                                                                                                                                             | Pantothenate and CoA biosynthesis; valine, leucine and isoleucine biosynthesis | XNR_1319                                                                  | SCO5514 or SCO7154                                                                 |
| HSDxi, HSDy                                                                                                                                                                                                                                                                                                                                                                                  | Glycine, serine and threonine metabolism                                       | XNR_1479                                                                  | SCO0420 or SCO5354                                                                 |
| PSCVT                                                                                                                                                                                                                                                                                                                                                                                        | Phenylalanine, tyrosine and tryptophan biosynthesis                            | XNR_1588                                                                  | SCO5212 or SCO6819                                                                 |
| PRPPS                                                                                                                                                                                                                                                                                                                                                                                        | Purine metabolism                                                              | XNR_2061                                                                  | SCO0782 or SCO3123                                                                 |
| ATNS_nh4                                                                                                                                                                                                                                                                                                                                                                                     | Phenylalanine, tyrosine and tryptophan biosynthesis                            | XNR_3034 and XNR_4836                                                     | (SCO3213 and SCO3214) or (SCO3213 and SCO2043)                                     |
| APCS, SPMS, SPRMS                                                                                                                                                                                                                                                                                                                                                                            | Glutathione metabolism; cysteine and methionine metabolism                     | XNR_3191                                                                  | SCO3655 or SCO2455                                                                 |
| DHAD1, DHAD2                                                                                                                                                                                                                                                                                                                                                                                 | Valine, leucine and isoleucine biosynthesis                                    | XNR_3504                                                                  | SCO1176 or SCO1888 or SCO3345                                                      |
| HMBS                                                                                                                                                                                                                                                                                                                                                                                         | Porphyrin and chlorophyll metabolism                                           | XNR_3532                                                                  | SCO7343 or SCO3318                                                                 |
| AMMQLT9, AMMQT9                                                                                                                                                                                                                                                                                                                                                                              | Ubiquinone and other terpenoid-quinone biosynthesis                            | XNR_3626                                                                  | SCO4556 or SCO5940                                                                 |
| 3OAS100, 3OAS110, 3OAS120, 3OAS121, 3OAS130, 3OAS140, 3OAS141, 3OAS150, 3OAS160, 3OAS161, 3OAS170, 3OAS180, 3OAS181, 3OAS50, 3OAS60, 3OAS70, 3OAS80, 3OAS90, 3OASai110, 3OASai130, 3OASai150, 3OASai170, 3OASai70, 3OASai90, 3OASi100, 3OASi110, 3OASi120, 3OASi130, 3OASi140, 3OASi150, 3OASi160, 3OASi170, 3OASi180, 3OASi60, 3OASi70, 3OASi80, 3OASi90, CDAS6, KAS14, OGMEACPS2, OPMEACPS | Fatty acid biosynthesis; biotin metabolism                                     | XNR_4509                                                                  | SCO0548 or SCO2390 or SCO1266 or SCO3248                                           |
| MCOATA                                                                                                                                                                                                                                                                                                                                                                                       | Fatty acid biosynthesis                                                        | XNR_4510 and XNR_4512                                                     | (SCO2387 and (SCO2389 or SCO0549 or SCO1267 or SCO1272))                           |
| CYO1ab, CYO2a                                                                                                                                                                                                                                                                                                                                                                                | Oxidative phosphorylation                                                      | XNR_4730 and XNR_4731 and XNR_4732                                        | (SCO2150 and SCO2149 and (SCO7236 or SCO2148 or SCO7120))                          |
| ANPRT                                                                                                                                                                                                                                                                                                                                                                                        | Phenylalanine, tyrosine and tryptophan biosynthesis                            | XNR_4733                                                                  | SCO2147 or SCO3212                                                                 |
| HOPNTAL3                                                                                                                                                                                                                                                                                                                                                                                     | Benzoate degradation                                                           | XNR_4831                                                                  | SCO2048 or SCP1301 or SCP153c                                                      |
| IGPS                                                                                                                                                                                                                                                                                                                                                                                         | Phenylalanine, tyrosine and tryptophan                                         | XNR_4840                                                                  | SCO2039 or SCO3211                                                                 |
| CHORM                                                                                                                                                                                                                                                                                                                                                                                        | Phenylalanine, tyrosine and tryptophan biosynthesis                            | XNR_4859                                                                  | SCO1762 or SCO2019 or SCO4784                                                      |
| PPND                                                                                                                                                                                                                                                                                                                                                                                         | Phenylalanine, tyrosine and tryptophan                                         | XNR_5061                                                                  | SCO1761 or SCO3221                                                                 |
| PC6YM                                                                                                                                                                                                                                                                                                                                                                                        | Porphyrin and chlorophyll metabolism                                           | XNR_5293                                                                  | SCO1555 or SCO1856                                                                 |
| GTPCII2                                                                                                                                                                                                                                                                                                                                                                                      | Metabolism of cofactors and vitamins                                           | XNR_5408                                                                  | SCO1441 or SCO2687 or SCO6655                                                      |

**Table S2.** Metabolic reactions in *Salb* -GEM and *Sco* -GEM associated with essential genes predicted in *Salb* -GEM with multiple paralogues in *Sco* -GEM. The table is organized by *S. albus* genes in ascending order.
