# Supplementary material for: Reconstruction of a Genome-Scale Metabolic Model of Streptomyces albus J1074: Improved Engineering Strategies in Natural Product Synthesis
Source: MDPI journal article supplement (doi:10.3390/metabo11050304), 2021-05-11
Supplement: s1 [file s1]

| Target product | Slope | Reaction ID | Reaction Name                                          | Pathway                                             | GPR                                                                                                                                                                                                   |
|----------------|-------|-------------|--------------------------------------------------------|-----------------------------------------------------|-------------------------------------------------------------------------------------------------------------------------------------------------------------------------------------------------------|
| naringenin     | 2.80  | FNOR        | putative ferredoxin/ferredoxin-NADP reductase          | FERI metabolism                                     | XNR_2490                                                                                                                                                                                              |
| naringenin     | 2.76  | ACCOAC      | acetyl-CoA carboxylase                                 | Fatty acid biosynthesis                             | (XNR_2648 and XNR_4211) or (XNR_2648 and XNR_2273) or (XNR_2648 and XNR_4019) or (XNR_1278 and XNR_1277 and XNR_4211) or (XNR_1278 and XNR_1277 and XNR_2273) or (XNR_1278 and XNR_1277 and XNR_4019) |
| naringenin     | 2.68  | ENO         | enolase                                                | Glycolysis/Gluconeogenesis                          | XNR_2005 or XNR_2219                                                                                                                                                                                  |
| naringenin     | 2.68  | PGM         | phosphoglycerate mutase                                | Glycolysis/Gluconeogenesis                          | XNR_3385 or XNR_4361                                                                                                                                                                                  |
| naringenin     | 2.60  | PYRS        | pyruvate synthase                                      | Pyruvate metabolism                                 | XNR_3672 or XNR_3673                                                                                                                                                                                  |
| naringenin     | 2.58  | HCO3E       | HCO <sub>3</sub> equilibration reaction                | Nitrogen metabolism                                 | XNR_2509 or XNR_2719 or XNR_4786                                                                                                                                                                      |
| naringenin     | 1.16  | PYK         | pyruvate kinase                                        | Glycolysis/Gluconeogenesis                          | XNR_1410 or XNR_4867                                                                                                                                                                                  |
| naringenin     | 0.98  | PPND        | prephenate dehydrogenase                               | Phenylalanine, tyrosine and tryptophan biosynthesis | XNR_5061                                                                                                                                                                                              |
| naringenin     | 0.98  | TYRTA       | tyrosine transaminase                                  | Phenylalanine, tyrosine and tryptophan biosynthesis | XNR_2937 or XNR_3189 or XNR_3703 or XNR_4825 or XNR_4967                                                                                                                                              |
| naringenin     | 0.95  | CHORM       | chorismate mutase                                      | Phenylalanine, tyrosine and tryptophan biosynthesis | XNR_4859                                                                                                                                                                                              |
| naringenin     | 0.92  | CHORS       | chorismate synthase                                    | Phenylalanine, tyrosine and tryptophan biosynthesis | XNR_5355                                                                                                                                                                                              |
| naringenin     | 0.92  | DDPA        | 3-deoxy-D-arabino-heptulosonate 7-phosphate synthetase | Phenylalanine, tyrosine and tryptophan biosynthesis | XNR_0595 or XNR_4763                                                                                                                                                                                  |
| naringenin     | 0.92  | DHQS        | 3-dehydroquinate synthase                              | Phenylalanine, tyrosine and tryptophan biosynthesis | XNR_5357                                                                                                                                                                                              |
| naringenin     | 0.92  | DHQTi       | 3-dehydroquinate dehydratase, irreversible             | Phenylalanine, tyrosine and tryptophan biosynthesis | XNR_4909                                                                                                                                                                                              |
| naringenin     | 0.92  | PSCVT       | 3-phosphoshikimate 1-carboxyvinyltransferase           | Phenylalanine, tyrosine and tryptophan biosynthesis | XNR_1588                                                                                                                                                                                              |
| naringenin     | 0.92  | SHK3Dr      | shikimate dehydrogenase                                | Phenylalanine, tyrosine and tryptophan biosynthesis | XNR_5354                                                                                                                                                                                              |
| naringenin     | 0.92  | SHKK        | shikimate kinase                                       | Phenylalanine, tyrosine and tryptophan biosynthesis | XNR_5356                                                                                                                                                                                              |
| naringenin     | 0.53  | TKT2        | transketolase                                          | Pentose phosphate pathway                           | XNR_4929                                                                                                                                                                                              |
| naringenin     | 0.50  | PPDK        | Pyruvate,phosphate dikinase                            | Glycolysis/Gluconeogenesis                          | XNR_4449                                                                                                                                                                                              |
| naringenin     | 0.23  | TPI         | triose-phosphate isomerase                             | Glycolysis/Gluconeogenesis                          | XNR_4921                                                                                                                                                                                              |

|            |      |           |                                                                                    |                                             |                                                                      |
|------------|------|-----------|------------------------------------------------------------------------------------|---------------------------------------------|----------------------------------------------------------------------|
| naringenin | 0.14 | RPE       | ribulose 5-phosphate 3-epimerase                                                   | Pentose phosphate pathway                   | XNR_5386                                                             |
| naringenin | 0.14 | RPI       | ribose-5-phosphate isomerase                                                       | Pentose phosphate pathway                   | XNR_4316                                                             |
| paulomycin | 2.77 | GALM1     | Aldose 1-epimerase                                                                 | Glycolysis/Gluconeogenesis                  | XNR_1676                                                             |
| paulomycin | 2.77 | GLUKB     | glucokinase-bglc                                                                   | Glycolysis/Gluconeogenesis                  | XNR_0083 or XNR_0553 or XNR_2406 or XNR_4754                         |
| paulomycin | 2.06 | NDPK2     | nucleoside-diphosphate kinase (ATP:UDP)                                            | Pyrimidine metabolism                       | XNR_4333                                                             |
| paulomycin | 2.00 | G1PTT     | dTTP:alpha-D-glucose-1-phosphate thymidyltransferase                               | Polyketide sugar unit biosynthesis          | XNR_0593                                                             |
| paulomycin | 1.98 | FMNRx2    | FMN reductase                                                                      | Riboflavin metabolism                       | XNR_0710 or XNR_3551                                                 |
| paulomycin | 1.98 | NDPK4     | nucleoside-diphosphate kinase (ATP:dTDP)                                           | Pyrimidine metabolism                       | XNR_4333                                                             |
| paulomycin | 1.60 | GALUi     | UTP-glucose-1-phosphate uridylyltransferase (irreversible)                         | Amino sugar and nucleotide sugar metabolism | XNR_2129                                                             |
| paulomycin | 1.41 | TRE6PS    | alpha,alpha-trehalose-phosphate synthase (UDP-forming)                             | Starch and sucrose metabolism               | XNR_2398                                                             |
| paulomycin | 1.41 | TRE6PPP   | trehalose-6-phosphate phosphorylase                                                | Starch and sucrose metabolism               | XNR_1712                                                             |
| paulomycin | 1.00 | ACACT1r   | acetyl-CoA C-acetyltransferase                                                     | Fatty acid biosynthesis                     | XNR_0217 or XNR_0301 or XNR_1438 or XNR_1987 or XNR_2158 or XNR_3582 |
| paulomycin | 1.00 | DDALLO    | dTDP-(2R,6S)-6-hydroxy-2-methyl-3-oxo-3,6-dihydro-2H-pyran-4-olate 3-ketoreductase | Polyketide sugar unit biosynthesis          | XNR_0575 or XNR_2309                                                 |
| paulomycin | 1.00 | ECOAHI    | 3-hydroxyacyl-CoA dehydratase (3-hydroxybutanoyl-CoA)                              | Fatty acid biosynthesis                     | XNR_0300 or XNR_2271                                                 |
| paulomycin | 1.00 | HBCO_nadp | 3-hydroxybutyryl-CoA dehydrogenase                                                 | Butanoate metabolism                        | XNR_0454 or XNR_1452 or XNR_5241                                     |
| paulomycin | 1.00 | TDPGDH    | dTDPglucose 4,6-dehydratase                                                        | Amino sugar and nucleotide sugar metabolism | XNR_0594                                                             |
| paulomycin | 0.99 | ADNK1     | adenosine kinase                                                                   | Purine metabolism                           | XNR_4722                                                             |
| paulomycin | 0.99 | AHCi      | adenosylhomocysteinase                                                             | Cysteine and methionine metabolism          | XNR_1908                                                             |
| paulomycin | 0.98 | DTMPK     | dTMP kinase                                                                        | Pyrimidine metabolism                       | XNR_2700                                                             |
| paulomycin | 0.98 | DUTPDP    | dUTP diphosphatase                                                                 | Pyrimidine metabolism                       | XNR_1004                                                             |
| paulomycin | 0.98 | NDPK6     | nucleoside-diphosphate kinase (ATP:dUDP)                                           | Pyrimidine metabolism                       | XNR_4333                                                             |
| paulomycin | 0.98 | TMDSf     | thymidylate synthase (Flavin-dependent)                                            | Pyrimidine metabolism                       | XNR_1124                                                             |

|            |      |          |                                                                  |                                                     |                                              |
|------------|------|----------|------------------------------------------------------------------|-----------------------------------------------------|----------------------------------------------|
| paulomycin | 0.95 | METAT    | methionine adenosyltransferase                                   | Methionine metabolism                               | XNR_5375                                     |
| paulomycin | 0.91 | METS     | methionine synthase                                              | Methionine metabolism                               | XNR_5171                                     |
| paulomycin | 0.90 | MTHFR3_1 | Methylenetetrahydrofolate reductase (NADPH)                      | Folate metabolism                                   | XNR_4775                                     |
| paulomycin | 0.79 | CHORS    | chorismate synthase                                              | Phenylalanine, tyrosine and tryptophan biosynthesis | XNR_5355                                     |
| paulomycin | 0.79 | DDPA     | 3-deoxy-D-arabino-heptulosonate 7-phosphate synthetase           | Phenylalanine, tyrosine and tryptophan biosynthesis | XNR_0595 or XNR_4763                         |
| paulomycin | 0.79 | DHQS     | 3-dehydroquinate synthase                                        | Phenylalanine, tyrosine and tryptophan biosynthesis | XNR_5357                                     |
| paulomycin | 0.79 | DHQTi    | 3-dehydroquinate dehydratase, irreversible                       | Phenylalanine, tyrosine and tryptophan biosynthesis | XNR_4909                                     |
| paulomycin | 0.79 | PSCVT    | 3-phosphoshikimate 1-carboxyvinyltransferase                     | Phenylalanine, tyrosine and tryptophan biosynthesis | XNR_1588                                     |
| paulomycin | 0.79 | SHK3Dr   | shikimate dehydrogenase                                          | Phenylalanine, tyrosine and tryptophan biosynthesis | XNR_5354                                     |
| paulomycin | 0.79 | SHKK     | shikimate kinase                                                 | Phenylalanine, tyrosine and tryptophan biosynthesis | XNR_5356                                     |
| paulomycin | 0.77 | ASPCT    | aspartate carbamoyltransferase                                   | Pyrimidine metabolism                               | XNR_5364                                     |
| paulomycin | 0.77 | DHORTS   | dihydroorotase                                                   | Pyrimidine metabolism                               | XNR_5365                                     |
| paulomycin | 0.77 | OMPDC    | orotidine-5'-phosphate decarboxylase                             | Pyrimidine metabolism                               | XNR_5370                                     |
| paulomycin | 0.77 | ORPT     | orotate phosphoribosyltransferase                                | Pyrimidine metabolism                               | XNR_3194                                     |
| paulomycin | 0.76 | PPDK     | Pyruvate,phosphate dikinase                                      | Glycolysis/Gluconeogenesis                          | XNR_4449                                     |
| paulomycin | 0.68 | APAT2r   | 3-Aminopropanoate:2-oxoglutarate aminotransferase                | beta-Alanine metabolism                             | XNR_1169 or XNR_2767                         |
| paulomycin | 0.68 | ASP1DC   | aspartate 1-decarboxylase                                        | beta-Alanine metabolism                             | XNR_0119 or XNR_3726 or XNR_4602             |
| paulomycin | 0.68 | MMSAD3   | methylmalonate-semialdehyde dehydrogenase (malonic semialdehyde) | Propanoate metabolism                               | XNR_0154 or XNR_4241                         |
| paulomycin | 0.68 | UMPK     | UMP kinase                                                       | Pyrimidine metabolism                               | XNR_1198                                     |
| paulomycin | 0.65 | TKT2     | transketolase                                                    | Pentose phosphate pathway                           | XNR_4929                                     |
| paulomycin | 0.64 | GLNS     | glutamine synthetase                                             | Alanine, aspartate and glutamate metabolism         | XNR_4631 or XNR_4658 or XNR_4684 or XNR_5219 |
| paulomycin | 0.54 | CBPS     | carbamoyl-phosphate synthase (glutamine-hydrolysing)             | Arginine and proline metabolism                     | XNR_5368 and XNR_5367                        |

|            |      |          |                                                        |                                                     |                                                                            |
|------------|------|----------|--------------------------------------------------------|-----------------------------------------------------|----------------------------------------------------------------------------|
| paulomycin | 0.52 | RPI      | ribose-5-phosphate isomerase                           | Pentose phosphate pathway                           | XNR_4316                                                                   |
| paulomycin | 0.51 | RPE      | ribulose 5-phosphate 3-epimerase                       | Pentose phosphate pathway                           | XNR_5386                                                                   |
| paulomycin | 0.38 | PRPPS    | phosphoribosylpyrophosphate synthetase                 | Purine metabolism                                   | XNR_2061                                                                   |
| paulomycin | 0.13 | ENO      | enolase                                                | Glycolysis/Gluconeogenesis                          | XNR_2005 or XNR_2219                                                       |
| paulomycin | 0.13 | PGM      | phosphoglycerate mutase                                | Glycolysis/Gluconeogenesis                          | XNR_3385 or XNR_4361                                                       |
| antimycin  | 0.98 | ANPRT    | anthranilate phosphoribosyltransferase                 | Phenylalanine, tyrosine and tryptophan biosynthesis | XNR_4733                                                                   |
| antimycin  | 0.98 | ATNS_nh4 | chorismate pyruvate-lyase                              | Phenylalanine, tyrosine and tryptophan biosynthesis | XNR_3034 or (XNR_5862 and XNR_4836) or XNR_3034 or (XNR_5862 and XNR_4836) |
| antimycin  | 0.98 | IGPS     | indole-3-glycerol-phosphate synthase                   | Phenylalanine, tyrosine and tryptophan biosynthesis | XNR_4840                                                                   |
| antimycin  | 0.98 | PRAIi    | phosphoribosylanthranilate isomerase (irreversible)    | Phenylalanine, tyrosine and tryptophan biosynthesis | XNR_4829                                                                   |
| antimycin  | 0.98 | TRPS1    | tryptophan synthase (indoleglycerol phosphate)         | Tryptophan metabolism                               | XNR_4842 and XNR_4841                                                      |
| antimycin  | 0.92 | HSK      | homoserine kinase                                      | Glycine, serine and threonine metabolism            | XNR_1477                                                                   |
| antimycin  | 0.92 | THRS     | threonine synthase                                     | Glycine, serine and threonine metabolism            | XNR_1478 or XNR_2396                                                       |
| antimycin  | 0.91 | CHORS    | chorismate synthase                                    | Phenylalanine, tyrosine and tryptophan biosynthesis | XNR_5355                                                                   |
| antimycin  | 0.91 | DDPA     | 3-deoxy-D-arabino-heptulosonate 7-phosphate synthetase | Phenylalanine, tyrosine and tryptophan biosynthesis | XNR_0595 or XNR_4763                                                       |
| antimycin  | 0.91 | DHQS     | 3-dehydroquinate synthase                              | Phenylalanine, tyrosine and tryptophan biosynthesis | XNR_5357                                                                   |
| antimycin  | 0.91 | DHQTi    | 3-dehydroquinate dehydratase, irreversible             | Phenylalanine, tyrosine and tryptophan biosynthesis | XNR_4909                                                                   |
| antimycin  | 0.91 | PSCVT    | 3-phosphoshikimate 1-carboxyvinyltransferase           | Phenylalanine, tyrosine and tryptophan biosynthesis | XNR_1588                                                                   |
| antimycin  | 0.91 | SHK3Dr   | shikimate dehydrogenase                                | Phenylalanine, tyrosine and tryptophan biosynthesis | XNR_5354                                                                   |
| antimycin  | 0.91 | SHKK     | shikimate kinase                                       | Phenylalanine, tyrosine and tryptophan biosynthesis | XNR_5356                                                                   |
| antimycin  | 0.84 | TKT2     | transketolase                                          | Pentose phosphate pathway                           | XNR_4929                                                                   |
| antimycin  | 0.81 | ASAD     | aspartate-semialdehyde dehydrogenase                   | Threonine and Lysine metabolism                     | XNR_2758 or XNR_4304                                                       |
| antimycin  | 0.81 | ASPK     | aspartate kinase                                       | Alanine, aspartate and glutamate metabolism         | XNR_2759                                                                   |

|            |       |        |                                                |                                                                                                                                                  |                                                                                                                                           |
|------------|-------|--------|------------------------------------------------|--------------------------------------------------------------------------------------------------------------------------------------------------|-------------------------------------------------------------------------------------------------------------------------------------------|
| antimycin  | 0.79  | RPI    | ribose-5-phosphate isomerase                   | Pentose phosphate pathway                                                                                                                        | XNR_4316                                                                                                                                  |
| antimycin  | 0.78  | RPE    | ribulose 5-phosphate 3-epimerase               | Pentose phosphate pathway                                                                                                                        | XNR_5386                                                                                                                                  |
| antimycin  | 0.72  | PRPPS  | phosphoribosylpyrophosphate synthetase         | Purine metabolism                                                                                                                                | XNR_2061                                                                                                                                  |
| antimycin  | 0.43  | PPDK   | Pyruvate phosphate dikinase                    | Glycolysis/Gluconeogenesis                                                                                                                       | XNR_4449                                                                                                                                  |
| antimycin  | 0.36  | ENO    | enolase                                        | Glycolysis/Gluconeogenesis                                                                                                                       | XNR_2005 or XNR_2219                                                                                                                      |
| antimycin  | 0.36  | PGM    | phosphoglycerate mutase                        | Glycolysis/Gluconeogenesis                                                                                                                       | XNR_3385 or XNR_4361                                                                                                                      |
| antimycin  | 0.20  | PGI    | glucose-6-phosphate isomerase                  | Glycolysis/Gluconeogenesis                                                                                                                       | XNR_4924                                                                                                                                  |
| candicidin | 13.90 | ACCOAC | acetyl-CoA carboxylase                         | Fatty acid biosynthesis                                                                                                                          | (XNR_2648 and XNR_2273) or XNR_4211 or (XNR_2648 and XNR_2273) or XNR_4019 or XNR_4211 or (XNR_2648 and XNR_2273) or XNR_4019 or XNR_4211 |
| candicidin | 13.08 | HCO3E  | HCO <sub>3</sub> equilibration reaction        | Nitrogen metabolism                                                                                                                              | XNR_2509 or XNR_2719 or XNR_4786                                                                                                          |
| candicidin | 9.51  | ENO    | enolase                                        | Glycolysis/Gluconeogenesis                                                                                                                       | XNR_2005 or XNR_2219                                                                                                                      |
| candicidin | 9.51  | PGM    | phosphoglycerate mutase                        | Glycolysis/Gluconeogenesis                                                                                                                       | XNR_3385 or XNR_4361                                                                                                                      |
| candicidin | 6.38  | HEX1   | glucokinase (D-glucose:ATP)                    | Starch and sucrose metabolism                                                                                                                    | XNR_0553 or XNR_4754 or XNR_0553 or XNR_4754 or XNR_0083 or (XNR_3293 and XNR_4146) or XNR_2406                                           |
| candicidin | 4.00  | MME    | methylmalonyl-CoA epimerase                    | Valine, leucine and isoleucine degradation                                                                                                       | XNR_1439                                                                                                                                  |
| candicidin | 4.00  | MMM2   | (R)-Methylmalonyl-CoA CoA-carbonylmultase      | Valine, leucine and isoleucine degradation;Glyoxylate and dicarboxylate metabolism;Propanoate metabolism;Carbon fixation pathways in prokaryotes | XNR_4666                                                                                                                                  |
| candicidin | 2.56  | GAPD   | glyceraldehyde-3-phosphate dehydrogenase       | Glycolysis/Gluconeogenesis                                                                                                                       | XNR_0959 or XNR_3771 or XNR_4919                                                                                                          |
| candicidin | 2.56  | PGK    | phosphoglycerate kinase                        | Glycolysis/Gluconeogenesis                                                                                                                       | XNR_4920                                                                                                                                  |
| candicidin | 1.55  | TPI    | triose-phosphate isomerase                     | Glycolysis/Gluconeogenesis                                                                                                                       | XNR_4921                                                                                                                                  |
| candicidin | 1.11  | FBA    | fructose-bisphosphate aldolase                 | Glycolysis/Gluconeogenesis                                                                                                                       | XNR_2411 or XNR_3195                                                                                                                      |
| candicidin | 1.11  | PFK    | phosphofructokinase                            | Glycolysis/Gluconeogenesis                                                                                                                       | XNR_1407 or XNR_5592                                                                                                                      |
| candicidin | 1.00  | MTHFC  | methenyltetrahydrofolate cyclohydrolase        | Folate metabolism                                                                                                                                | XNR_3872 or XNR_5257                                                                                                                      |
| candicidin | 1.00  | MTHFD  | methylenetetrahydrofolate dehydrogenase (NADP) | Folate metabolism                                                                                                                                | XNR_3872 or XNR_5257                                                                                                                      |
| candicidin | 0.97  | ADCL   | 4-aminobenzoate synthase                       | Folate biosynthesis                                                                                                                              | XNR_5309                                                                                                                                  |
| candicidin | 0.97  | ADCS   | 4-amino-4-deoxychorismate synthase             | Folate biosynthesis                                                                                                                              | XNR_3034 or XNR_5308 or XNR_5862                                                                                                          |

|            |      |         |                                                           |                                                     |                                              |
|------------|------|---------|-----------------------------------------------------------|-----------------------------------------------------|----------------------------------------------|
| candicidin | 0.78 | PGI     | glucose-6-phosphate isomerase                             | Glycolysis/Gluconeogenesis                          | XNR_4924                                     |
| candicidin | 0.73 | ADSL1r  | adenylosuccinate lyase                                    | Purine metabolism                                   | XNR_5550                                     |
| candicidin | 0.73 | ADSS    | adenylosuccinate synthase                                 | Purine metabolism                                   | XNR_3210                                     |
| candicidin | 0.63 | CHORS   | chorismate synthase                                       | Phenylalanine, tyrosine and tryptophan biosynthesis | XNR_5355                                     |
| candicidin | 0.63 | DDPA    | 3-deoxy-D-arabino-heptulosonate 7-phosphate synthetase    | Phenylalanine, tyrosine and tryptophan biosynthesis | XNR_0595 or XNR_4763                         |
| candicidin | 0.63 | DHQS    | 3-dehydroquinate synthase                                 | Phenylalanine, tyrosine and tryptophan biosynthesis | XNR_5357                                     |
| candicidin | 0.63 | DHQTi   | 3-dehydroquinate dehydratase, irreversible                | Phenylalanine, tyrosine and tryptophan biosynthesis | XNR_4909                                     |
| candicidin | 0.63 | PSCVT   | 3-phosphoshikimate 1-carboxyvinyltransferase              | Phenylalanine, tyrosine and tryptophan biosynthesis | XNR_1588                                     |
| candicidin | 0.63 | SHK3Dr  | shikimate dehydrogenase                                   | Phenylalanine, tyrosine and tryptophan biosynthesis | XNR_5354                                     |
| candicidin | 0.63 | SHKK    | shikimate kinase                                          | Phenylalanine, tyrosine and tryptophan biosynthesis | XNR_5356                                     |
| candicidin | 0.57 | GLNS    | glutamine synthetase                                      | Alanine, aspartate and glutamate metabolism         | XNR_4631 or XNR_4658 or XNR_4684 or XNR_5219 |
| candicidin | 0.56 | ADSL2r  | adenylosuccinate lyase                                    | Purine metabolism                                   | XNR_5550                                     |
| candicidin | 0.56 | AIRCcr  | phosphoribosylaminoimidazole carboxylase                  | Purine metabolism                                   | XNR_1959 and XNR_1960                        |
| candicidin | 0.56 | GARFT   | phosphoribosylglycinamide formyltransferase               | Purine metabolism                                   | XNR_3869                                     |
| candicidin | 0.56 | GLUPRT  | glutamine phosphoribosyldiphosphate amidotransferase      | Purine metabolism                                   | XNR_2842                                     |
| candicidin | 0.56 | PRAGSr  | phosphoribosylglycinamide synthase                        | Purine metabolism                                   | XNR_2857                                     |
| candicidin | 0.56 | PRAIS   | phosphoribosylaminoimidazole synthase                     | Purine metabolism                                   | XNR_2841                                     |
| candicidin | 0.56 | PRASCSi | phosphoribosylaminoimidazolesuccinocarboxamide synthase   | Purine metabolism                                   | XNR_2854                                     |
| candicidin | 0.56 | PRFGS   | phosphoribosylformylglycinamidine synthase                | Purine metabolism                                   | XNR_2844 and XNR_2845 and XNR_2846           |
| candicidin | 0.44 | AICART  | phosphoribosylaminoimidazolecarboxamide formyltransferase | Purine metabolism                                   | XNR_3870                                     |
| candicidin | 0.44 | IMPC    | IMP cyclohydrolase                                        | Purine metabolism                                   | XNR_3870                                     |

|              |       |         |                                                               |                                             |                                                 |
|--------------|-------|---------|---------------------------------------------------------------|---------------------------------------------|-------------------------------------------------|
| candicidin   | 0.38  | TKT2    | transketolase                                                 | Pentose phosphate pathway                   | XNR_4929                                        |
| candicidin   | 0.15  | RPI     | ribose-5-phosphate isomerase                                  | Pentose phosphate pathway                   | XNR_4316                                        |
| candicidin   | 0.13  | RPE     | ribulose 5-phosphate 3-epimerase                              | Pentose phosphate pathway                   | XNR_5386                                        |
| thiocoraline | 38.73 | ASPT    | aspartate ammonia-lyase                                       | Alanine, aspartate and glutamate metabolism | XNR_4132                                        |
| thiocoraline | 17.71 | MTHFC   | methenyltetrahydrofolate<br>cyclohydrolase                    | Folate metabolism                           | XNR_3872 or XNR_5257                            |
| thiocoraline | 17.71 | MTHFD   | methylenetetrahydrofolate<br>dehydrogenase (NADP)             | Folate metabolism                           | XNR_3872 or XNR_5257                            |
| thiocoraline | 16.51 | PPDK    | Pyruvate,phosphate dikinase                                   | Glycolysis/Gluconeogenesis                  | XNR_4449                                        |
| thiocoraline | 14.43 | GLNS    | glutamine synthetase                                          | Alanine, aspartate and glutamate metabolism | XNR_4631 or XNR_4658 or XNR_4684 or<br>XNR_5219 |
| thiocoraline | 10.46 | PRPPS   | phosphoribosylpyrophosphate<br>synthetase                     | Purine metabolism                           | XNR_2061                                        |
| thiocoraline | 9.38  | ADSL1r  | adenylsuccinate lyase                                         | Purine metabolism                           | XNR_5550                                        |
| thiocoraline | 9.38  | ADSS    | adenylosuccinate synthase                                     | Purine metabolism                           | XNR_3210                                        |
| thiocoraline | 8.99  | ADSL2r  | adenylosuccinate lyase                                        | Purine metabolism                           | XNR_5550                                        |
| thiocoraline | 8.99  | AIRC    | phosphoribosylaminoimidazole<br>carboxylase                   | Purine metabolism                           | XNR_1959 and XNR_1960                           |
| thiocoraline | 8.99  | GARFT   | phosphoribosylglycinamide<br>formyltransferase                | Purine metabolism                           | XNR_3869                                        |
| thiocoraline | 8.99  | GLUPRT  | glutamine<br>phosphoribosyldiphosphate<br>amidotransferase    | Purine metabolism                           | XNR_2842                                        |
| thiocoraline | 8.99  | PRAGSr  | phosphoribosylglycinamide<br>synthase                         | Purine metabolism                           | XNR_2857                                        |
| thiocoraline | 8.99  | PRAIS   | phosphoribosylaminoimidazole<br>synthase                      | Purine metabolism                           | XNR_2841                                        |
| thiocoraline | 8.99  | PRASCSi | phosphoribosylaminoimidazoles<br>uccinocarboxamide synthase   | Purine metabolism                           | XNR_2854                                        |
| thiocoraline | 8.99  | PRFGS   | phosphoribosylformylglycinamid<br>ine synthase                | Purine metabolism                           | XNR_2844 and XNR_2845 and XNR_2846              |
| thiocoraline | 8.73  | AICART  | phosphoribosylaminoimidazoleca<br>rboxamide formyltransferase | Purine metabolism                           | XNR_3870                                        |
| thiocoraline | 8.73  | IMPC    | IMP cyclohydrolase                                            | Purine metabolism                           | XNR_3870                                        |
| thiocoraline | 7.05  | RPI     | ribose-5-phosphate isomerase                                  | Pentose phosphate pathway                   | XNR_4316                                        |

|              |      |          |                                                           |                                          |                                  |
|--------------|------|----------|-----------------------------------------------------------|------------------------------------------|----------------------------------|
| thiocoraline | 7.01 | RPE      | ribulose 5-phosphate 3-epimerase                          | Pentose phosphate pathway                | XNR_5386                         |
| thiocoraline | 6.72 | PGCD     | phosphoglycerate dehydrogenase                            | Glycine, serine and threonine metabolism | XNR_1318                         |
| thiocoraline | 6.72 | PSERT    | phosphoserine transaminase                                | Glycine, serine and threonine metabolism | XNR_2290                         |
| thiocoraline | 6.72 | PSP_L    | phosphoserine phosphatase (L-serine)                      | Glycine, serine and threonine metabolism | XNR_5015                         |
| thiocoraline | 4.58 | ADSK     | adenylyl-sulfate kinase                                   | Cysteine metabolism                      | XNR_0713                         |
| thiocoraline | 4.58 | BPNT     | 3',5'-bisphosphate nucleotidase                           | Cysteine and methionine metabolism       | XNR_1642                         |
| thiocoraline | 4.58 | SADT2    | Sulfate adenylyltransferase                               | Sulfur metabolism                        | XNR_0715 and XNR_0714            |
| thiocoraline | 4.58 | SULR_syn | Hydrogen-sulfide:ferredoxin oxidoreductase                | Sulfur metabolism                        | XNR_0710                         |
| thiocoraline | 3.58 | TKT2     | transketolase                                             | Pentose phosphate pathway                | XNR_4929                         |
| thiocoraline | 3.42 | TALA     | transaldolase                                             | Pentose phosphate pathway                | XNR_4928                         |
| thiocoraline | 3.42 | TKT1     | transketolase                                             | Pentose phosphate pathway                | XNR_4929                         |
| thiocoraline | 2.90 | CYSS     | cysteine synthase                                         | Cysteine and methionine metabolism       | XNR_0070 or XNR_1784             |
| thiocoraline | 1.96 | NMNAT    | nicotinamide-nucleotide adenylyltransferase               | Nicotinate and nicotinamide metabolism   | XNR_4358                         |
| thiocoraline | 1.96 | NMNHYD   | Adenosine kinase                                          | Nicotinate and nicotinamide metabolism   | XNR_3310                         |
| thiocoraline | 1.96 | NNAM     | nicotinamidase                                            | Nicotinate and nicotinamide metabolism   | XNR_1793                         |
| thiocoraline | 1.96 | NNDPR    | nicotinate-nucleotide diphosphorylase (carboxylating)     | Nicotinate and nicotinamide metabolism   | XNR_3475                         |
| thiocoraline | 1.96 | NP1      | Purine-nucleoside phosphorylase                           | Nicotinate and nicotinamide metabolism   | XNR_4012                         |
| thiocoraline | 1.96 | NT5C     | Nicotinate D-ribonucleotide phosphohydrolase              | Nicotinate and nicotinamide metabolism   | XNR_3310                         |
| thiocoraline | 1.96 | PNP      | Purine-nucleoside phosphorylase                           | Nicotinate and nicotinamide metabolism   | XNR_4012                         |
| thiocoraline | 1.96 | QULNS    | quinolinate synthase                                      | Nicotinate and nicotinamide metabolism   | XNR_4717                         |
| thiocoraline | 1.96 | ASPO2    | L-aspartate:NAD <sup>+</sup> oxidoreductase (deaminating) | Nicotinate and nicotinamide metabolism   | XNR_0361                         |
| thiocoraline | 1.81 | METAT    | methionine adenosyltransferase                            | Methionine metabolism                    | XNR_5375                         |
| thiocoraline | 1.68 | SHSL2    | O-succinylhomoserine lyase (H <sub>2</sub> S)             | Cysteine and methionine metabolism       | XNR_2948 or XNR_4037 or XNR_5540 |
| thiocoraline | 1.62 | METS     | methionine synthase                                       | Methionine metabolism                    | XNR_5171                         |
| thiocoraline | 1.61 | MTHFR3_1 | Methylenetetrahydrofolate reductase (NADPH)               | Folate metabolism                        | XNR_4775                         |



|              |      |        |                                                        |                                                     |                       |
|--------------|------|--------|--------------------------------------------------------|-----------------------------------------------------|-----------------------|
| thiocoraline | 0.97 | HSDy   | homoserine dehydrogenase (NADPH)                       | Glycine, serine and threonine metabolism            | XNR_1479              |
| thiocoraline | 0.83 | ANPRT  | anthranilate phosphoribosyltransferase                 | Phenylalanine, tyrosine and tryptophan biosynthesis | XNR_4733              |
| thiocoraline | 0.83 | IGPS   | indole-3-glycerol-phosphate synthase                   | Phenylalanine, tyrosine and tryptophan biosynthesis | XNR_4840              |
| thiocoraline | 0.83 | PRAIi  | phosphoribosylanthranilate isomerase (irreversible)    | Phenylalanine, tyrosine and tryptophan biosynthesis | XNR_4829              |
| thiocoraline | 0.83 | TRPS1  | tryptophan synthase (indoleglycerol phosphate)         | Tryptophan metabolism                               | XNR_4842 and XNR_4841 |
| thiocoraline | 0.32 | ASAD   | aspartate-semialdehyde dehydrogenase                   | Threonine and Lysine metabolism                     | XNR_2758 or XNR_4304  |
| thiocoraline | 0.32 | ASPK   | aspartate kinase                                       | Alanine, aspartate and glutamate metabolism         | XNR_2759              |
| thiocoraline | 0.16 | CHORS  | chorismate synthase                                    | Phenylalanine, tyrosine and tryptophan biosynthesis | XNR_5355              |
| thiocoraline | 0.16 | DDPA   | 3-deoxy-D-arabino-heptulosonate 7-phosphate synthetase | Phenylalanine, tyrosine and tryptophan biosynthesis | XNR_0595 or XNR_4763  |
| thiocoraline | 0.16 | DHQS   | 3-dehydroquinate synthase                              | Phenylalanine, tyrosine and tryptophan biosynthesis | XNR_5357              |
| thiocoraline | 0.16 | DHQTi  | 3-dehydroquinate dehydratase, irreversible             | Phenylalanine, tyrosine and tryptophan biosynthesis | XNR_4909              |
| thiocoraline | 0.16 | PSCVT  | 3-phosphoshikimate 1-carboxyvinyltransferase           | Phenylalanine, tyrosine and tryptophan biosynthesis | XNR_1588              |
| thiocoraline | 0.16 | SHK3Dr | shikimate dehydrogenase                                | Phenylalanine, tyrosine and tryptophan biosynthesis | XNR_5354              |
| thiocoraline | 0.16 | SHKK   | shikimate kinase                                       | Phenylalanine, tyrosine and tryptophan biosynthesis | XNR_5356              |

**Table S4.** Summary of all predicted FSEOF overexpression targets sorted by product of interest. Slopes indicate the flux of the associated target reaction per unit flux increase in the target reaction. Pathway and GPR information are displayed for each reaction.
